23 **Organ-wide and ploidy-dependent regulations both contribute to cell size**  
24 **determination: evidence from a computational model of tomato fruit**

25 Valentina Baldazzi<sup>1,2,3</sup>, Pierre Valsesia<sup>1</sup>, Michel Génard<sup>1</sup>, Nadia Bertin<sup>1</sup>

26 <sup>1</sup>INRA, PSH, France

27 <sup>2</sup>Université Côte d'Azur, INRA, CNRS, ISA, France

28 <sup>3</sup>Université Côte d'Azur, Inria, INRA, CNRS, UPMC Univ Paris 06, BIOCORE,  
29 France

30 **Abstract**

31 **The development of a new organ is the result of coordinated events of cell**  
32 **division and expansion, in strong interaction with each other. This paper**  
33 **presents a dynamic model of tomato fruit development that includes cell**  
34 **division, endoreduplication and expansion processes. The model is used to**  
35 **investigate the potential interaction among these developmental processes,**  
36 **in the perspective of the neo-cellular theory. In particular, different control**  
37 **schemes (either cell-autonomous or organ-controlled) are tested and**  
38 **compared to experimental data related to two contrasted genotypes. The**  
39 **model shows that a pure cell-autonomous control fails to reproduce the**  
40 **observed cell size distribution, and an organ-wide control is required in**  
41 **order to get realistic cell size variations. The model also supports the role**  
42 **of endoreduplication as an important determinant of final cell size and**  
43 **suggests that a direct effect of endoreduplication on cell expansion is**  
44 **needed in order to obtain a significant correlation between size and ploidy,**  
45 **as observed in real data.**

46 **Keywords:** division, expansion, endoreduplication, development, tomato, model

47 **INTRODUCTION**

48           Understanding the mechanisms underpinning fruit development from its  
49 early stages is of primary importance for biology and agronomy. Indeed, early  
50 stages are highly sensitive to biotic and abiotic stresses, with important  
51 consequences on fruit set and yield. The development of a new organ is the  
52 result of coordinated events of cell division and expansion. Fruit growth starts  
53 immediately after pollination with intensive cell division. As development  
54 proceeds, the proliferative activity of cells progressively slows down giving way to  
55 a phase of pure cell enlargement during fruit growth and ripening. In many  
56 species, including tomato, the transition from cell division to expansion phases is  
57 accompanied by repeated DNA duplications without mitosis, a process called  
58 endoreduplication. The exact role of endoreduplication is still unclear. A significant  
59 correlation between cell ploidy (i.e number of DNA copies) and cell size has been  
60 observed in different species, including tomato fruit, suggesting a possible role of  
61 endoreduplication into the control of organ growth Breuer et al., 2010; Chevalier  
62 et al., 2011; Cheniclet, 2005). Several studies however showed that, under  
63 specific conditions, the two processes can be uncoupled to some extent, so that  
64 ploidy is not the only determinant of cell size (Bertin, 2005; Cookson *et al.*,  
65 2006).

66           Understanding the way cell division, endoreduplication and expansion  
67 processes interact is crucial to predict the emergence of important morphological  
68 traits (fruit size, mass, shape and texture) and their dependence on  
69 environmental and genetic factors. Historically, a big debate has opposed two  
70 contrasting views, the cellular vs the organismal theory, that set the control of  
71 organ growth at the level of the individual cell or of the whole tissue, respectively  
72 (reviewed in Beemster et al., 2003; Fleming, 2006; John and Qi, 2008). In the  
73 recent years, a consensus view, the neo-cellular theory, has eventually emerged.  
74 Accordingly, although cells are the units of plant morphology, their behavior  
75 (division, expansion) is not autonomous, but coordinated at the organ level by  
76 cell-to-cell communication mechanisms (Beemster et al., 2003; Sablowski and  
77 Carnier Dornelas, 2014; Tsukaya, 2003). The existence of non-cell autonomous  
78 control of organ development has been demonstrated in Arabidopsis leaf

79 (Kawade et al., 2010) but the underlying modes of action remain unclear and  
80 often species- or organ-specific (Ferjani et al., 2007; Han et al., 2014; Horiguchi  
81 and Tsukaya, 2011; Norman et al., 2011; Okello et al., 2015).

82 Computational models offer a unique tool to express and test biological  
83 hypotheses, in a well-defined and controlled manner. Not surprisingly, indeed,  
84 computational modeling has been largely used to investigate the relationships  
85 between organ development and the underlying cellular processes. Many works  
86 have addressed the question of organogenesis, relating local morphogenetic  
87 rules and cell mechanical properties with the emerging patterns near the  
88 meristem (Boudon et al., 2015; Dupuy et al., 2010; Kuchen et al., 2012; Löffke  
89 et al., 2015; Lucas et al., 2013; Robinson et al., 2011; von Wangenheim et al.,  
90 2016). At the tissue scale, a few models have addressed the issue of cell size  
91 variance based on observed kinematic patterns of cell division or growth rates,  
92 with a particular attention to the intrinsic stochasticity of cell-cycle related  
93 processes (Asl et al., 2011; Kawade and Tsukaya, 2017; Roeder et al., 2010). In  
94 most of these models, cell expansion is simply described via an average growth  
95 rate, possibly modulated by the ploidy level of the cell, without any reference to  
96 the underlying molecular mechanisms or to the environmental conditions.

97 To our knowledge, very few attempts have been made to explicitly model  
98 the interaction among cell division, expansion and endoreduplication and at the  
99 scale of organ development. In Fanwoua et al., 2013 a model of tomato fruit  
100 development has been developed that integrates cell division, expansion and  
101 endoreduplication processes based on a set of biologically-inspired rules. The  
102 fruit is described by a set of  $q$  classes of cells with the same age, ploidy and  
103 mass. Within each class, cell division and endoreduplication are described as  
104 discrete events that take place within a well-defined window of time, whenever a  
105 specific mass-to-ploidy threshold is reached. Cell growth in dry mass is modeled  
106 following a source-sink approach as a function of thermal time, cell's ploidy and  
107 external resources. The model is able to qualitatively capture the effect of

108 environmental conditions (temperature, fruit load) on the final fruit dry mass, but  
109 hypotheses and parameters are hard to validate as comparison to experimental  
110 data is lacking. Moreover, the water content of the cell is not considered  
111 preventing the analysis of cell volumes.

112 Baldazzi and coworkers recently developed an integrated model of tomato  
113 fruit development which explicitly accounts for the dynamics of cell proliferation  
114 as well as for the mechanisms of cell expansion, in both dry and fresh masses,  
115 based on biophysical and thermodynamical principles (Baldazzi et al., 2012,  
116 2013). Here, a new version of this model, that includes cell endoreduplication is  
117 proposed. The model was used to investigate different hypotheses concerning  
118 the regulation and the interaction among cellular processes, with special attention  
119 to 1) the importance of an organ-wide regulation on cell growth and 2) the  
120 potential effect of endoreduplication on cell expansion.

121 We focus on wild-type organ development and we analyze the effect of organ-  
122 wide or cell ploidy-dependent regulation onto the dynamics of cell expansion. To  
123 this aim, different control schemes (either cell-autonomous or organ-controlled,  
124 with or without ploidy effect on cell expansion) were tested *in silico* by means of  
125 specific model variants. Simulation results were analyzed and compared to cell  
126 size distributions observed in the fruit pericarp of two contrasted genotypes, a  
127 cherry and a large-fruited tomato variety.

128 The model shows that a pure cell-autonomous control cannot reproduce  
129 the experimental cell size distribution, and organ-wide and ploidy-dependent  
130 controls are required in order to get realistic cell sizes. In particular, a direct effect  
131 of endoreduplication on cell expansion was needed in order to obtain a  
132 significant correlation between size and ploidy, as observed in real data.

## 133 **MATERIALS AND METHODS**

### 134 **Experimental data**

135 Two datasets were collected from two glasshouse experiments performed at  
136 INRA Avignon (south of France) in 2004 and 2007 on large-fruited (cv Levovil)  
137 and cherry (cv. Cervil) tomato genotypes of *Solanum lycopersicum* L.  
138 The 2004 experiment fruits were collected from April to May (planting in February)  
139 whereas in the 2007 experiment fruits were sampled from October to December  
140 (planting in August). Plants were grown according to standard cultural practices.  
141 Trusses were pruned in order to homogenize truss size along the stem within  
142 each genotype. The maximum number of flowers left on each inflorescence was  
143 12 for Cervil and 6 for Levovil. Flowers were pollinated by bumblebees. Air  
144 temperature and humidity were recorded hourly in each experiment and input in  
145 the model as external signals.

146 In both experiments, flower buds and fruits were sampled at different time  
147 points relative to the time of flower anthesis (full-flower opening). Fruit fresh and  
148 dry mass and pericarp fresh mass were systematically measured at all times  
149 points. Pericarp dry mass was estimated assuming a dry mass content equivalent  
150 to that of the whole fruit.

151 In 2004, half of the fruit pericarps were then analyzed by flow cytometry  
152 and the other half were used for the determination of cell number. The number of  
153 pericarp cells was measured after tissue dissociation according to a method  
154 adapted from that of Bünger-Kibler and Bangerth, 1982 and detailed in Bertin et  
155 al., 2003. Cells were counted in aliquots of the cell suspension under an optical  
156 microscope, using Fuchs-Rosenthal chambers or Bürker chambers for the large  
157 and small fruits, respectively. Six to 8 aliquots per fruits were observed and the  
158 whole pericarp cell number was calculated according to dilution and observation  
159 volumes. The ploidy was measured in the pericarp tissue, as described in Bertin  
160 et al., 2007. The average value of three measurements per fruit (when allowed  
161 for by the fruit's size), was included in the analysis.

162 In the 2007 experiment, the dynamics of cell number (but not endoreduplication)

163 was measured following the same method as in the 2004 experiment. In  
164 addition, cell size distribution (smallest and largest radii and 2D-surface)  
165 distributions were measured with ImageJ software ([imagej.nih.gov/ij/](http://imagej.nih.gov/ij/)) in the cell  
166 suspension aliquots. About 20 to 25 cells per fruit pericarp were measured  
167 randomly, on several fruits. Cell size distribution were measured on ripe fruits at  
168 about 43 days after anthesis (DAA) for Cervil and 60 DAA for Levovil in the  
169 considered growing conditions.

## 170 **Model description**

171 The model is composed of two interacting modules, both issued from  
172 previously published models (Bertin et al., 2007; Fishman and Génard, 1998; Liu  
173 et al., 2007). The fruit is described as a collection of cell populations, each one  
174 having a specific age, ploidy and volume, which evolve and grow over time during  
175 fruit development. Two cell classes are defined: the proliferating cells and the  
176 expanding – endoreduplicating cells. The division-endoreduplication module  
177 governs the evolution of the number of cells in each classes, their age (initiation  
178 date) and ploidy level, based on genotype-specific parameters (Bertin et al.,  
179 2007). At each mitotic cycle, a fraction of proliferating cells proceeds through  
180 division whereas the remaining ones enter the expansion phase: a new group of  
181 expanding cells is created, together with an array of sub-classes of possible  
182 ploidy levels  $p$ . At initialization of the group, all expanding cells are put into the  
183 4C level.

184

185 It is assumed that the onset of endoreduplication coincides with the beginning of  
186 the expansion phase. As the endocycles proceed, in each group of expanding  
187 cells, a fraction  $\sigma$  of the cells increases its ploidy level  $p$  by a factor 2 and the  
188 distribution of cells across the different ploidy levels is updated.

189 At any time, the mass (both fresh and dry component) of expanding cells is  
190 computed by a biophysical expansion module according to cell's characteristics

190 (age, ploidy) and depending on available resources and environmental  
191 conditions (Fishman and Génard, 1998; Liu et al., 2007). Briefly, cell expansion is  
192 described by iteratively solving the Lockhart equation relating the rate of volume  
193 increase to the cell's internal pressure and cell's mechanical properties (Lockhart,  
194 1965). Flows of water and solutes across the membrane are described by  
195 thermodynamic equations and depend on environmental conditions. The relative  
196 importance of each transport process may vary along fruit developmental stages,  
197 depending on specific developmental control. A full description of the model and  
198 its equations can be found in the section S2 of the Supplemental Material.

199 The model assumes that all cells have equal access to external resources,  
200 independently from the number of cells (no competition). All the parameters of  
201 the division- endoreduplication module are considered to be independent from  
202 environmental conditions for the time being.

### 203 **Model initialisation and input**

204 The model starts at the end of the pure division phase, when the  
205 proliferative activity of the cells declines and the expansion phase begins  
206 (Baldazzi et al., 2013). For Cervil genotype this corresponds to approximately 8  
207 days before anthesis and to 3 days before anthesis for Levovil genotype (Bertin  
208 et al., 2007). The initial number of cells for the 2007 experiment,  $n_0$ , was  
209 estimated to  $3.3e3$  for the cherry tomato (Cervil) and  $4.6e4$  for the large-fruited  
210 (Levovil) genotype based on a few measurements. At the beginning of the  
211 simulation, all cells are supposed proliferating with a ploidy level of 2C (transient  
212 ploidy of 4C during cell cycle is not considered here). Proliferating cells are  
213 supposed to have a constant cell mass,  $m_0$ , as often observed in meristematic  
214 cells (homogeneity in cell size) (Sablowski and Carnier Dornelas, 2014; Serrano-  
215 Mislata et al., 2015).

216 The initial mass of the fruit is therefore  $M_f(0) = n_0 * m_0 = n_0 * (w_0 + s_0)$ , where  $w_0$  and  
217  $s_0$  are initial cell water and dry mass, respectively. At any time, cells leaving the

217 proliferative phase start to grow, from an initial mass  $2*m_0$  and a ploidy level of  
218  $4C$ , according to the expansion model.

219 Cell expansion depends on environmental conditions and resources provided by  
220 the mother plant. The phloem sugar concentration is assumed to vary daily  
221 between 0.15 and 0.35 M whereas stem water potential oscillates between -0.05  
222 and -0.6 MPa i.e. typical pre-dawn and minimal stem water potential measured  
223 for the studied genotypes. Temperature and humidity are provided directly by  
224 real-time recording of greenhouse climatic conditions.

### 225 **Choice of the model variants: control of cell expansion capabilities**

226 In the integrated model, a number of time-dependent functions account for  
227 developmental regulations of cell metabolism and physical properties during the  
228 expansion phase (Baldazzi et al. 2013, Liu et al.2007 ). Two characteristic time-  
229 scales are recognizable in the model: the *cell age*, i.e. the time spent since an  
230 individual cell has left the proliferative phase, and *organ age* i.e. the time spent  
231 since the beginning of the simulation (Figure 1). Depending on the settings of the  
232 corresponding time-dependent functions, different cellular processes may be put  
233 under cell-autonomous or non-cell autonomous control (hereafter indicated as  
234 organ-wide control), allowing for an *in silico* exploration of alternative control  
235 hypotheses in the perspective of the cellular and organismal theories. Moreover,  
236 a direct effect of cell DNA content onto cell expansion capabilities may be tested  
237 according to biological evidences (Chevalier et al., 2011; Edgar et al., 2014;  
238 Sugimoto-Shirasu and Roberts, 2003).

239 As a default all cellular processes are supposed to depend on cell age (cell-  
240 autonomous control) with the only exception of cell transpiration which is  
241 computed at the organ scale, on the basis of fruit external surface and skin  
242 conductance, and then distributed back to individual cells, proportionally to their  
243 relative water content (see section S2).



244 Based on literature information and on preliminary tests (Baldazzi et al.,  
245 2013, 2017) the switch between symplastic and apoplastic transport,  $\sigma_p$  has  
246 been selected as the candidate process for an organ-wide control. Indeed,  
247 intercellular movement of macromolecules across plasmodesmata has been  
248 shown to be restricted by organ age in tobacco leaves (Crawford and Zambryski,  
249 2001; Zambryski, 2004) and it is known to be important for cell-to-cell  
250 communication (Han et al., 2013).

251 The exact mechanisms by which cell DNA content may affect cell expansion  
252 remain currently unknown. Based on literature information and common sense,  
253 three distinct mechanisms of action of endoreduplication on cell expansion were  
254 hypothesized.

255 1) Endoreduplication has been often associated to an elevated protein synthesis  
256 and transcriptional activity (Chevalier et al., 2014) suggesting a general activation  
257 of the nuclear and metabolic machinery of the cell to sustain cell growth  
258 (Sugimoto-Shirasu and Roberts, 2003). Following these insights, a first  
259 hypothesis assumes an effect of endoreduplication on cell expansion as a ploidy-  
260 dependent maximal import rate for carbon uptake. For sake of simplicity, the  
261 relation was supposed to be linear in the number of endocycles. The  
262 corresponding equation, as a function of the cell DNA content ( $DNAC$ , being 2 for  
263 dividing cells, 4 to 512 for endoreduplicating cells), was

$$v_m = \langle v^0 \rangle * \log_2(DNAC)$$

264 where  $\langle v^0 \rangle$  is the average C uptake activity per unit mass.

265 2) Assuming that cell shape remains the same with increasing ploidy,  
266 endoreduplicating cells are characterized by a reduced surface-to-volume ratio  
267 with respect to 2C cells (Schoenfelder and Fox, 2015) . As a consequence, it is

268 tempting to suppose that one possible advantage of a high ploidy level may  
269 reside in a reduction of carbon demand for cell wall and structural units (Barow,  
270 2006; Pirrello et al., 2018). We speculated that such an economy may impact cell  
271 expansion capabilities in two ways. First, the metabolic machinery could be  
272 redirected towards the synthesis of soluble components, thus contributing to the  
273 increase of cell's internal pressure and consequent volume expansion.

274 In the model, the *ssrat* fraction of soluble compound within the cell is  
275 developmentally regulated by the age *t* of the cell (Baldazzi et al. 2013) as

$$ssrat = b_{ssrat} (1 - e^{-a_{ssrat} * t}) + ssrat_0$$

276 In the presence of a ploidy effect, the final *bssrat* value was further increased as

$$b_{ssrat} = b_{ssrat}^0 * \log_2(DNAc)$$

277 3) Alternatively, "exceeding" carbon may be used to increase the rate of cell wall  
278 synthesis or related proteins, possibly resulting in a increase of cell wall  
279 plasticity as shown in other systems (Proseus and Boyer, 2006, Jégu *et al.*,  
280 2013).

281 In the original expansion model on tomato (Liu et al., 2007) cell wall extensibility  
282  $\Phi$  declines during cell maturation (Proseus et al., 1999) as

$$\Phi = \Phi_{min} + \frac{(\Phi_{max} - \Phi_{min})}{1 + e^{k(t-t_0)}}$$

283 In the presence of a ploidy effect, the maximal cell wall extensibility was  
284 increased as

$$\phi_{max} = \phi_{max}^0 * \log_2(DNAc)$$

285 The individual and combined effects of organ-wide and ploidy-dependent control  
286 on cell expansion were investigated and compared to a full cell-autonomous  
287 model. A total of 10 model variants have been tested for each genotype,  
288 following the experimental design shown in Table 1.

## 289 **Model calibration**

290 Calibration has been performed using genetic algorithm under R software (library  
291 'genalg'). Due to data limitations, a three-steps procedure has been used for each  
292 tomato genotype.

293 First, the division-endoreduplication module (7 parameters) was calibrated on  
294 data from the 2004 experiment by comparing measured and simulated values of  
295 the total pericarp cell number and the proportion of cells in different ploidy  
296 classes, all along fruit development. In particular, this allowed the estimation of  
297 the average duration of the endocycle ( $\tau_E$ ) and the proportion ( $\sigma$ ) of the  
298 cells performing a new endoreduplication round every time  $\tau_E$ .

299 The best fitting values of  $\sigma$  and  $\tau_E$  were selected and kept fixed for the  
300 second phase of the calibration, assuming they depend little on environmental  
301 conditions (Bertin, 2005). The dynamics of cell division (5 parameters) was then  
302 re-estimated on cell number measured in the 2007 experiment, in order to  
303 account for environmental regulations of the mitotic cell cycle (see Supplement  
304 Information, section S3.1). The best fitting parameters were selected and used for  
305 the last calibration step.

306 The expansion module was calibrated on the evolution of pericarp fresh and dry  
307 mass from the 2007 experiment, for which cell size distribution were measured.  
308 Six parameters have been selected for calibration based on a previous sensitivity  
309 analysis (Constantinescu et al., 2016), whereas the others have been fixed to the  
310 original values (Baldazzi et al., 2013; Fishman and Génard, 1998; Liu et al.,

311 2007). An additional parameter was estimated for model variants M3 to M24 in  
312 order to correctly evaluate the strength of the ploidy-dependent control (see  
313 section S3 for more information) .

314 Due to their different structures, the expansion module was calibrated  
315 independently for each model variant. The quality of model adjustment was  
316 evaluated using a Normalized Root Mean Square Error (NRMSE):

$$NRMSE(x) = 100 \frac{\sqrt{\frac{1}{n} \sum_i (O_i - S_i(x))^2}}{\frac{1}{n} \sum_i O_i}$$

317 where  $O_i$  and  $S_i$  are respectively, the observed and simulated values of pericarp  
318 fresh and dry masses, and  $n$  is the number of observations.  $x = \{x_1, x_2 \dots x_p\}$  is  
319 parameter set of the evaluated solution. The smaller the NRMSE the better the  
320 goodness-of-fit is. A NRMSE < 20% is generally considered good, fair if 20% <  
321 NRMSE < 30% and poor otherwise.

322 Three to five estimations were performed for each model variant and genotype.

### 323 **Solution selection and model comparison**

324 For each calibration solution, the corresponding cell size distribution at fruit  
325 maturity (i.e. 43 DAA for Cervil, 60 DAA for Levovil) was reconstructed and  
326 compared to the measured data.

327 A *semi-quantitative* comparison approach has been used due to the limited  
328 experimental information available: the general distribution characteristics (shape,  
329 positioning and dispersion) have been characterized rather than a perfect fit. To  
330 this aim, 8 descriptive statistical indicators  $m(i)$  have been computed for each  
331 solution and compared to those derived from real-data distribution, namely:

- 332 • skewness and kurtosis (distribution's shape)

- 333 • mean and median cell size (positioning)
- 334 • standard deviation (SD) and median absolute deviation (MAD) (data  
335 dispersion)
- 336 • maximal and minimal cell size (data dispersion)

337 Confidence interval (CI, 95%) for the experimental distribution indicators were  
338 estimated using a Bootstrap approach on 10000 samples.

339 Based on this scores, the distance between the predicted and the observed  
340 distribution has been quantified as the euclidean distance between each indicator  
341  $m(i)$  and its corresponding measured value, weighted by the amplitude of the  
342 confidence interval (DeltaCI) of the indicator itself:

$$D = \sqrt{\frac{\sum_{i=1}^8 (m_{model}(i) - m_{data}(i))^2}{DeltaCI(i)}}$$

343 For each model variant, the selection of the best calibration solution has been  
344 performed based on a compromise between quality of the fit at the whole fruit  
345 scale (as measured by the total NRMSE) and quality of the corresponding cell  
346 size distribution (as measured by D, see section S3.2). Estimated parameters for  
347 the retained solution are reported in tables S3 and S4.

348 In order to compare the distributions issued from the different models, a  
349 *principal component analysis* (PCA) was performed on the 8 descriptors of cell  
350 distribution arising from each model estimation. The *ade4* library of R software  
351 was used for this purpose (R development Core Team 2006).

## 352 RESULTS

### 353 A characteristic right-tailed distribution of cell areas

354 The distribution of cell sizes at a given stage of fruit development directly  
355 depends on the particular cell division and expansion patterns followed by the  
356 organ up to the considered time. Any change in the cell division or expansion rate  
357 will have a consequence on the shape and position of the resulting distribution.  
358 For both tomato genotypes considered in this study, the distribution of pericarp  
359 cell areas at mature stage shows a typical right-tailed shape (Figure 2),  
360 compatible with a Weibull or a Gamma distribution (see section S1). The  
361 observed cell sizes span up to two orders of magnitude, with cell areas (cross  
362 section) ranging from 0.004 to 0.08 mm<sup>2</sup> for Cervil genotype, and from 0.005 to  
363 0.28 mm<sup>2</sup> for Levovil (Table 3 and 4). The average cell area is calculated to be  
364 0.026 mm<sup>2</sup> for the cherry tomato and 0.074 mm<sup>2</sup> for the large-fruited genotype,  
365 values in agreement with data from other tomato varieties (Bertin, 2005;  
366 Renaudin et al., 2017). Data dispersion is higher for the large-fruited genotype,  
367 but the shape of the distribution, as measured by its skewness and kurtosis  
368 values, is pretty similar for both tomato varieties.  
369 In the following, the effect of specific control mechanisms on the resulting cell  
370 area distribution is analysed in details, based on the results obtained for the  
371 selected solution (see M&M section, 'Solution Selection'). The corresponding  
372 statistical descriptors are reported in Table 2 and 3, for Cervil and Levovil  
373 genotype respectively. Note that predicted minimal cell sizes for Levovil genotype  
374 are systematically lower than experimental measurements and correspond to the  
375 size of proliferating cells (assumed constant in the present version of the model).

## 376 **A simple cell-autonomous control scheme leads to unrealistic cell size** 377 **distribution**

378 As a benchmark model, the case of a simple cell-autonomous control,  
379 without ploidy-dependent effect, was first considered (version M0 of the model).  
380 Accordingly, two cells with the same age, even if initiated at different fruit  
381 developmental stages, behave identically in what concerns carbon metabolism,

382 transport and wall mechanical properties. In this scheme, therefore, cell size  
383 variations derive exclusively from the dynamics of cell division, that cause a shift  
384 in the initiation date for different cohort of cells. When applied to our genotypes,  
385 the cell-autonomous model was able to reproduce the observed pericarp mass  
386 dynamics but the corresponding cell size distribution was extremely narrow  
387 (see Table 2 and 3 ).

388 Including an organ-wide mechanism that controls cell size (model M1)  
389 introduces a source of variance among cells. In this case, two cells of the same  
390 age which were initiated at different fruit stages do *not* behave identically,  
391 resulting in different expansion capabilities and growth patterns (Figure 3,  
392 Baldazzi et al. 2013). As a result, standard deviation doubled and skewness  
393 increased towards small positive values, indicating a slightly right-tailed cell size  
394 distribution, both for both cherry and large-fruited tomatoes (Table 2 and 3).  
395 However, the maximum cell size predicted by the model remained much smaller  
396 than expected, suggesting that a mechanism controlling cell expansion is  
397 lacking in the model.

### 398 **Endoreduplication and cell growth: possible action and genotypic effect**

399 The suggestion that nuclear ploidy level may be important for cell size control  
400 has been often reported in literature. However, the molecular mechanism by  
401 which ploidy could modulate cell expansion capabilities remain elusive. In this  
402 work, three cell properties have been selected as possible targets of ploidy-  
403 dependent modulation (see M&M section): a) the maximum carbon uptake rate  
404 b) carbon allocation between soluble and non-soluble compounds c) cell wall  
405 plasticity. The three hypotheses were tested on both genotypes, in combination  
406 or not with an organ-wide control.

407 A principal component analysis was performed on 8 statistical descriptors of cell  
408 size distribution in order to compare predictions of the different models (see

409 M&M and Tables 2 and 3 ). For both genotypes, the first two principal  
410 components explained approximately 90% of observed variance (Figure 4 and 5).  
411 Separation was mainly performed by the first principal component on the basis of  
412 the width of the distribution (sd, mad and maximal cell size ), on one side, and its  
413 mean and median values, on the other direction.

414 As already mentioned, models with simple cell-autonomous control were  
415 characterized by narrow distributions but centered around a larger mean (and  
416 median) value. The addition of an organ or ploidy effect on cell expansion  
417 resulted in an increase in cell size variance and skewness, shifting the  
418 distribution towards the observed right-tailed shape (Table 2 and 3). Models  
419 combining an organ-wide and a ploidy-dependent control were closer to  
420 experimental data, although they could not fully approach the observed  
421 distribution in the case of the cherry tomato genotype.

422 When analysed in details, results show that the relative importance of the organ-  
423 wide and the ploidy-dependent control of cell expansion was genotype-  
424 dependent. In the case of Levovil, organ-wide control turned out to be the major  
425 regulatory mode. With the exception of M7, models without organ-control  
426 (models M0, M5,M6) completely failed to reproduce the observations, resulting in  
427 a very narrow and left-tailed cell size distribution. Organ-wide coordination of cell  
428 expansion appeared to be the main responsible for positive skewness of cell size  
429 distribution whereas the addition of an endoreduplication-mediated modulation  
430 of cell expansion capabilities, alone, resulted only in a marginal improvement of  
431 model's performances.

432 The relative roles of ploidy-dependent and organ-wide control of cell growth  
433 appeared more balanced in cherry tomatoes. Both models including an organ-  
434 wide (M1) or a ploidy-mediated control of cell expansion ( models M5 to M7)  
435 resulted in very narrow and quite symmetric distribution. The concomitant action  
436 of both control mechanisms was needed in order to get the expected right-tailed  
437 distribution and realistic cell size variations (model M2-M4, M23 and M24). The



438 two mechanisms thus seem to act in synergy to increase cell expansion and final  
439 cell size.

440 **A direct influence of endoreduplication on cell expansion is needed to get**  
441 **correlation between cell size and ploidy**

442 A strong correlation has been often reported between cell size and ploidy level.  
443 This may be partly innate to the temporal evolution of endoreduplication, as cells  
444 with a high ploidy necessary had more time to growth, without being halved by  
445 cell division. On this basis, some authors have claimed that the observed  
446 correlation between size and ploidy is just a matter of time and there's no need of  
447 any direct effect of endoreduplication on cell growth to explain the data (Roeder  
448 *et al.*, 2010; Robinson *et al.*, 2018).

449 We checked this intuition with the help of our modelling framework. A linear  
450 regression analysis between cell size and DNA content was performed for all  
451 tested models, at fruit maturity. Results are reported in table S5.  
452 For both genotypes, no correlation was found for models M0 and M1 (Figures 6  
453 and 7, left panel) due to the asynchrony in cell division and endoreduplication  
454 patterns. Indeed, cells can attain a same ploidy level following different temporal  
455 sequences of expansion and endocycle events, leading to a large variability of  
456 possible cell sizes and ages within a same ploidy class. As long as ploidy level  
457 and growth rate are independent (as in models M0 and M1), the specific  
458 endoreduplication pattern has no consequence on the final cell size: variations in  
459 cell sizes simply reflect variations in cell ages and no correlation is found, on  
460 average, between the ploidy and size.

461 A direct effect of ploidy on cell expansion rate was needed in order to get a non-  
462 zero correlation between ploidy and size in our model. In particular, models in  
463 which the ploidy level affected the carbon import rate (M2, M5, M23, M24) led to

464 a significant positive correlation between ploidy and size (p-values <0.001), for  
465 both genotypes (see Table S5, Figure 6 and 7, right panel). In these models, the  
466 observed increase in cell size with increasing ploidy level was directly linked to  
467 enhanced cell expansion capabilities, and significant correlation was found  
468 between ploidy and maximal cell growth rate (Table S6).

469 Interestingly, the heterogeneity in cell sizes increased with increasing ploidy  
470 (Levene test on size variance, p-value <0.001), in agreement to what observed  
471 in another tomato variety (Bourdon et al 2011). Cell size variations were larger  
472 for Levovil genotype than for the cherry tomato variety due to its extended  
473 division phase, that increased variability in the timing of exit from the mitotic  
474 phase (Figure 6, right panel).

## 475 **DISCUSSION**

476 The present paper describes an improved version of an integrated cell  
477 division-expansion model that explicitly accounts for DNA endoreduplication, an  
478 important mechanism in tomato fruit development. The model is used to  
479 investigate the interaction among cell division, endoreduplication and expansion  
480 processes, in the framework of the neo-cellular theory (Beemster et al., 2003).  
481 To this aim, 10 model variants including or not a ploidy-dependent and an organ-  
482 wide control of cell development have been tested and compared to data from  
483 two contrasting tomato genotypes. Specific cellular processes have been  
484 hypothesized as possible targets of both modes of control, based on literature  
485 information. It is important to stress that the molecular basis of the supposed  
486 regulations are not described in the model and could involve many molecular  
487 players, including hormones, mechanical signals etc. Moreover, the existence of  
488 other targets for organ-wide or ploidy-dependent regulations cannot be excluded,  
489 as well as the contribution of other mechanisms to the control of cell growth. The  
490 objective of the paper, indeed, was not to identify the exact mechanism of  
491 interaction between endoreduplication and expansion, but rather to test *if* a direct

492 influence of ploidy onto cell expansion, in combination or not with an organ-wide  
493 control, was likely to be involved in the control of fruit growth.

494 Model simulations showed that a pure cell-autonomous control was unable  
495 to reproduce the observed cell size distribution, resulting in a very narrow  
496 distribution, well different from the expected skewed, right-tailed shape. In  
497 agreement with the neo-cellular theory, the model supports the need for an  
498 organ-wide control of cell growth as a key mechanism to increase cell size  
499 variance and points to a direct effect of cell ploidy on cell expansion potential.

#### 500 **Measurement of cell size distribution: a promising approach to understand** 501 **the control of fruit growth**

502 Our work is based on the analysis of cell size distribution as a footprint of  
503 different control schemes. When looking at our results, indeed, the NRMSE with  
504 respect to pericarp fresh and dry mass data was always between 20% and 30%  
505 indicating a satisfactory agreement with data, independently from the model  
506 version and the tomato genotype. This highlights the fact that the dynamics of  
507 fruit growth alone is not enough to discriminate between several biologically-  
508 plausible models. In this sense, cell size distribution represents a much more  
509 informative dataset as it uniquely results from the specific cell division and  
510 expansion patterns of the organ (Halter et al., 2009).

511 The assessment of cell sizes in an organ is not an easy task though and  
512 the employed measurement technique may have important consequences on the  
513 resulting cell size distribution (Legland et al., 2012). Indeed, mechanical  
514 constraints acting on real tissues as well as vascularisation can largely modify  
515 cell shape, resulting in elongated or multi-lobed cells (Ivakov and Persson,  
516 2013). Thus, if the orientation of 2D slices can potentially affect the resulting cell  
517 area estimation, possible differences between *in-vivo* tissues and dissociated  
518 cells should also be systematically checked (McAtee et al. 2009). The size of the

519 dataset is also important to correctly characterized the expected distribution  
520 shape. Indeed, outliers can significantly affect the estimation of high-order  
521 moments, especially in heavy-tailed distribution like the one usually observed in  
522 plant organs. The above reasons explain why we decided to focus on a  
523 qualitative comparison of simulated and experimental cell size distribution rather  
524 than on a perfect fit. Moreover, uncertainty in our dataset has been accounted for  
525 via the the estimation of confidence intervals for the experimental distribution  
526 moments.

527 In perspective, the use of mutant or modified strains (Musseau et al., 2017)  
528 in combination with recent advancements in microscopy and tomography could  
529 permit the acquisition of more reliable datasets, opening the way to a in-depth  
530 investigation of cell size distribution in relation to fruit tissues and to the  
531 underlying molecular processes (Mebatsion et al., 2009; Wuyts et al., 2010) .

### 532 **The relative importance of organ-wide and ploidy-dependent controls may** 533 **be genotype-dependent**

534 According to the model, organ-wide control was responsible for cell-to-cell  
535 variations but a ploidy-mediated effect on cell expansion was needed in order to  
536 obtain a significant correlation between size and ploidy as observed in  
537 experimental data of fruit pericarp (Bourdon et al., 2011). However, the relative  
538 importance of the two modes of control may be genotype-dependent.

539 For the large-fruited variety, organ-wide control was the dominant  
540 mechanism. This is probably due to its long division phase that causes the  
541 appearance of new expanding cells late in the fruit development, once  
542 plasmodesmata closure is already completed. Independently of the targeted  
543 process, the addition of a ploidy-dependent effect instead, did not significantly  
544 modify the predicted cell size distribution. The model supports the idea that cell  
545 ploidy may fix a maximum potential growth rate. Given the large fruit mass in  
546 Levovil genotype, it is possible that such a potential may not be completely

547 reached in our experimental conditions, due to limited plant resources.

548 In the case of the cherry tomato variety, the effect of a ploidy-dependent  
549 mechanism was more pronounced, especially when affecting cell carbon  
550 metabolism. Models combining both an organ and a ploidy-dependent control  
551 performed better than the others although they failed to fully account for the  
552 experimental cell size distribution. A few reasons may explain this discrepancy.  
553 First, due to a lack of data, the endoreduplication dynamics has been calibrated  
554 on the 2004 experiment whereas the division and the expansion modules have  
555 been estimated on the 2007 data, for which the cell size distribution was  
556 available. Little is known about the possible dependence of endoreduplication on  
557 environmental variables (Engelen-Eigles *et al.*, 2000; Setter and Flannigan, 2001;  
558 Cookson *et al.*, 2006). In tomato fruit, changes in ploidy levels were mainly linked  
559 to changes in the duration of the mitotic phase (Bertin, 2005) but a direct effect of  
560 environmental fluctuations on endoreduplication-related parameters cannot be  
561 excluded. This may be particularly true for the cherry tomato genotype, for which  
562 the dynamics of cell division differed significantly between the two years (see  
563 Supplemental data, section S3). One can therefore expect that the progression of  
564 endocycle may have been different too, with possible consequences on the  
565 shape of the resulting cell size distribution. Preliminary simulations showed that  
566 an acceleration of the endocycle or an increase of the proportion of cells that  
567 enter a new round of endoreduplication can spread the resulting distribution  
568 towards large cell sizes, increasing the overall variance in models including a  
569 ploidy-dependent effect .

570 In addition to cell-cycle-related mechanisms, environment and cultural practices  
571 can also affect resources availability at the cell scale. In many fruit species  
572 including tomato, a negative correlation between average cell size and cell  
573 number has been observed, suggesting the existence of a competition for  
574 resources ( Prudent *et al.*, 2013). This kind of mechanism may widen the range  
575 of attainable cell sizes, increasing size variations between first and late-initiated

576 cells. The importance of such an effect may vary with genotype and  
577 environmental conditions (Bertin, 2005; Quilot and Génard, 2008).

578 **Stochasticity in cellular processes may be important to explain cell size**  
579 **variance in fruit**

580 Our model is an example of population model: the fruit is described as a  
581 collection of cell groups, each having specific characteristics in terms of number,  
582 mass, age and ploidy level, that dynamically evolve during time. Although  
583 asynchrony in the emergence of cell groups allowed to capture a considerable  
584 part of cell-to-cell heterogeneity, the intrinsic stochasticity of cellular processes  
585 (Meyer and Roeder, 2014; Robinson et al., 2011b; Smet and Beeckman, 2011) is  
586 not accounted for. Variations in the threshold size for division (often associated to  
587 a change in the cell cycle duration) as well as asymmetric cell divisions are  
588 considered as important determinant of the final cell size (Dupuy et al., 2010;  
589 Osella et al., 2014; Roeder et al., 2010; Stukalin et al., 2013). They may  
590 contribute to significantly spread the size distribution of both proliferating and  
591 expanding cell groups, from the early stages. Moreover, the degree of additional  
592 dispersion introduced by cell expansion is likely to depend on the specificity of the  
593 underlying mechanisms, with possible interactions with ploidy-dependent and  
594 organ-wide controls.

595 In perspective, the addition of stochastic effects could help to fill the missing  
596 variance for both Cervil and Levovil genotypes. To this aim, a novel modelling  
597 scheme is needed in which the average cell mass of a group is replaced by a  
598 distribution function of cell sizes, whose parameters can evolve with time under  
599 the effect of cell expansion processes.

600 **Correlation between size and ploidy : a clue for a direct influence of**  
601 **endoreduplication on cell expansion in tomato fruit?**

602 Our results showed that asynchrony in cell division and endoreduplication events  
603 prevented the emergence of a correlation between size and ploidy based only on  
604 time proceeding. According to the present model, a direct effect of nuclear ploidy  
605 on the attainable cell growth rate is needed in order to obtain the observed  
606 correlation in tomato fruit. This is in line with literature data pointing to ploidy  
607 level setting the maximum cell growth rate that can be attained or not,  
608 depending on internal (hormones) and external (environmental) factors (Breuer et  
609 al., 2010; Chevalier et al., 2011; De Veylder et al., 2011). Of course, this result  
610 may be less striking in systems where the progression of endocycles is more  
611 sequential. This may be the case of *Arabidopsis thaliana* sepals, where data are  
612 consistent with a model in which expanding cells undergo a new round of  
613 endoreduplication at each time step (Roeder et al., 2010). In this latter system,  
614 variability among cell size arises from asymmetry in cell division and variations in  
615 the exit time from mitotic cycle, whereas no differences in the growth rate is  
616 observed among cells with different ploidy level (Tauriello *et al.*, 2015; Robinson  
617 *et al.*, 2018).

618 Overall, these results confirm that the relationship between  
619 endoreduplication and expansion may not be universal but can differ depending  
620 on the considered organ. Moreover, attention should also be paid to cell  
621 identity. Indeed, quantitative differences in the strength of the ploidy-dependent  
622 effect have been demonstrated between pavement and mesophyll cells in  
623 *Arabidopsis* leaves (Katagiri et al., 2016; Kawade and Tsukaya, 2017), whereas  
624 cell-layer specific developmental patterns have been observed in tomato fruit  
625 (Renaudin et al. 2017). In the model developed here, the spatial distribution of  
626 expanding-endoreduplicating cells is not accounted for. In perspective, a model  
627 including distinct cell-layer populations, with specific expansion programs, may  
628 help to refine the relation between ploidy-size.

629 At term, improvements in the ability of computation models to integrate  
630 the multiple facets of organ development in a mechanistic way can help to  
631 evaluate and quantify the contribution of the different processes to the control of

632 cell growth.

### 633 **Acknowledgments**

634 The authors warmly thank B. Brunel for help with cell measurements. The  
635 authors are grateful to Inria Sophia Antipolis – Méditerranée "NEF" computation  
636 cluster for providing resources and support. This work was partially funded by the  
637 Agence Nationale de la Recherche, Project "Frimouss" (grant no. ANR-15-  
638 CE20-0009) and by the Agropolis Foundation under the reference ID 1403-032  
639 through the « Investissements d'avenir » programme (Labex Agro:ANR-10-LABX-  
640 0001-01).

### 641 **Literature cited**



- 642 Asl, L.K., Dhondt, S., Boudolf, V., Beemster, G.T.S., Beeckman, T., Inzé, D.,  
643 Govaerts, W., and De Veylder, L. (2011). Model-based analysis of Arabidopsis  
644 leaf epidermal cells reveals distinct division and expansion patterns for pavement  
645 and guard cells. *Plant Physiol.* *156*, 2172–2183.
- 646 Baldazzi, V., Bertin, N., Genard, M., and Génard, M. (2012). A model of fruit  
647 growth integrating cell division and expansion processes. In *Acta Horticulturae*,  
648 (International Society for Horticultural Science (ISHS); Leuven; Belgium), pp.  
649 191–196.
- 650 Baldazzi, V., Pinet, A., Vercambre, G., Bénard, C., Biais, B., and Génard, M.  
651 (2013). In-silico analysis of water and carbon relations under stress conditions. A  
652 multi-scale perspective centered on fruit. *Front. Plant Sci.* *4*, 495.
- 653 Baldazzi, V., Génard, M., and Bertin, N. (2017). Cell division, endoreduplication  
654 and expansion processes: setting the cell and organ control into an integrated  
655 model of tomato fruit development. *Acta Hortic.* *1182*.
- 656 Barow, M. (2006). Endopolyploidy in seed plants. *BioEssays* *28*, 271–281.
- 657 Beemster, G.T.S., Fiorani, F., and Inzé, D. (2003). Cell cycle: the key to plant  
658 growth control? *Trends Plant Sci.* *8*, 154–158.
- 659 Bertin, N. (2005). Analysis of the tomato fruit growth response to temperature and  
660 plant fruit load in relation to cell division, cell expansion and DNA  
661 endoreduplication. *Ann. Bot.* *95*, 439–447.
- 662 Bertin, N., Génard, M., and Fishman, S. (2003). A model for an early stage of  
663 tomato fruit development: cell multiplication and cessation of the cell proliferative  
664 activity. *Ann. Bot.* *92*, 65–72.
- 665 Bertin, N., Lecomte, A., Brunel, B., Fishman, S., and Génard, M. (2007). A model  
666 describing cell polyploidization in tissues of growing fruit as related to cessation of  
667 cell proliferation. *J. Exp. Bot.* *58*, 1903–1913.
- 668 Boudon, F., Chopard, J., Ali, O., Gilles, B., Hamant, O., Boudaoud, A., Traas, J.,  
669 and Godin, C. (2015). A Computational Framework for 3D Mechanical Modeling  
670 of Plant Morphogenesis with Cellular Resolution. *PLoS Comput. Biol.* *11*,  
671 e1003950.
- 672 Bourdon, M., Coriton, O., Pirrello, J., Cheniclet, C., Brown, S.C., Pujol, C.,  
673 Chevalier, C., Renaudin, J.-P., and Frangne, N. (2011). In planta quantification of  
674 endoreduplication using fluorescent in situ hybridization (FISH). *Plant J.* *66*,  
675 1089–1099.

- 676 Breuer, C., Ishida, T., and Sugimoto, K. (2010). Developmental control of  
677 endocycles and cell growth in plants. *Curr. Opin. Plant Biol.* *13*, 654–660.
- 678 Brunkard, J.O., Runkel, A.M., and Zambryski, P.C. (2015). The cytosol must flow:  
679 intercellular transport through plasmodesmata. *Curr. Opin. Cell Biol.* *35*, 13–20.
- 680 Büniger-Kibler, S., and Bangerth, F. (1982). Relationship between cell number,  
681 cell size and fruit size of seeded fruits of tomato (*Lycopersicon esculentum* Mill.),  
682 and those induced parthenocarpically by the application of plant growth  
683 regulators. *Plant Growth Regul.* *1*, 143–154.
- 684 Cheniclet C. 2005. Cell Expansion and Endoreduplication Show a Large Genetic  
685 Variability in Pericarp and Contribute Strongly to Tomato Fruit Growth. *Plant*  
686 *Physiology* *139*, 1984–1994.
- 687 Chevalier, C., Nafati, M., Mathieu-Rivet, E., Bourdon, M., Frangne, N., Cheniclet,  
688 C., Renaudin, J.-P., Gévaudant, F., and Hernould, M. (2011). Elucidating the  
689 functional role of endoreduplication in tomato fruit development. *Ann. Bot.* *107*,  
690 1159–1169.
- 691 Chevalier, C., Bourdon, M., Pirrello, J., Cheniclet, C., Gévaudant, F., Frangne, N.,  
692 Gevaudant, F., Frangne, N., Gévaudant, F., and Frangne, N. (2014).  
693 Endoreduplication and fruit growth in tomato: evidence in favour of the  
694 karyoplasmic ratio theory. *J. Exp. Bot.* *65*, 1–16.
- 695 Constantinescu, D., Memmah, M.-M., Vercambre, G., Génard, M., Baldazzi, V.,  
696 Causse, M., Albert, E., Brunel, B., Valsesia, P., and Bertin, N. (2016). Model-  
697 Assisted Estimation of the Genetic Variability in Physiological Parameters Related  
698 to Tomato Fruit Growth under Contrasted Water Conditions. *Front. Plant Sci.* *7*,  
699 1–17.
- 700 Cookson SJ, Radziejwoski A, Granier C. 2006. Cell and leaf size plasticity in  
701 *Arabidopsis*: what is the role of endoreduplication? *Plant, Cell and Environment*  
702 *29*, 1273–1283.
- 703 Crawford, K.M., and Zambryski, P.C. (2001). Non-targeted and targeted protein  
704 movement through plasmodesmata in leaves in different developmental and  
705 physiological states. *Plant Physiol.* *125*, 1802–1812.
- 706 De Veylder, L., Larkin, J.C., and Schnittger, A. (2011). Molecular control and  
707 function of endoreplication in development and physiology. *Trends Plant Sci.* *16*,  
708 624–634.
- 709 Dupuy, L., Mackenzie, J., and Haseloff, J. (2010). Coordination of plant cell

- 710 division and expansion in a simple morphogenetic system. *Proc. Natl. Acad. Sci.*  
711 *U. S. A.* *107*, 2711–2716.
- 712 Edgar, B.A., Zielke, N., and Gutierrez, C. (2014). Endocycles: a recurrent  
713 evolutionary innovation for post-mitotic cell growth. *Nat. Rev. Mol. Cell Biol.* *15*,  
714 197–210.
- 715 Engelen-Eigles G, Jones RJ, Phillips RL. 2000. DNA endoreduplication in maize  
716 endosperm cells: the effect of exposure to short-term high temperature. *Plant,*  
717 *Cell and Environment* *23*, 657–663.
- 718 Fanwoua, J., de Visser, P., Heuvelink, E., Yin, X., Struik, P.C., and Marcelis,  
719 L.F.M. (2013). A dynamic model of tomato fruit growth integrating cell division, cell  
720 growth and endoreduplication. *Funct. Plant Biol.* *40*, 1098.
- 721 Ferjani, A., Horiguchi, G., Yano, S., and Tsukaya, H. (2007). Analysis of leaf  
722 development in fugu mutants of *Arabidopsis* reveals three compensation modes  
723 that modulate cell expansion in determinate organs. *Plant Physiol.* *144*, 988–999.
- 724 Fishman, S., and Génard, M. (1998). A biophysical model of fruit growth:  
725 simulation of seasonal and diurnal dynamics of mass. *Plant Cell Env.* *21*, 739–  
726 752.
- 727 Fleming, A.J. (2006). The integration of cell proliferation and growth in leaf  
728 morphogenesis. *J. Plant Res.* *119*, 31–36.
- 729 Halter, M., Elliott, J.T., Hubbard, J.B., Tona, A., and Plant, A.L. (2009). Cell  
730 volume distributions reveal cell growth rates and division times. *J. Theor. Biol.*  
731 *257*, 124–130.
- 732 Han, X., Kumar, D., Chen, H., Wu, S., and Kim, J.-Y. (2013). Transcription factor-  
733 mediated cell-to-cell signalling in plants. *J. Exp. Bot.*
- 734 Han, X., Kumar, D., Chen, H., Wu, S., and Kim, J.Y. (2014). Transcription factor-  
735 mediated cell-to-cell signalling in plants. *J. Exp. Bot.* *65*, 1737–1749.
- 736 Horiguchi, G., and Tsukaya, H. (2011). Organ Size Regulation in Plants: Insights  
737 from Compensation. *Front. Plant Sci.* *2*, 24.
- 738 Ivakov, A., and Persson, S. (2013). Plant cell shape: modulators and  
739 measurements. *Front. Plant Sci.* *4*, 439.
- 740 Jégu T, Latrasse D, Delarue M, *et al.* 2013. Multiple functions of Kip-related  
741 protein5 connect endoreduplication and cell elongation. *Plant physiology* *161*,  
742 1694–705.

- 743 John, P.C.L., and Qi, R. (2008). Cell division and endoreduplication: doubtful  
744 engines of vegetative growth. *Trends Plant Sci.* *13*, 121–127.
- 745 Katagiri, Y., Hasegawa, J., Fujikura, U., Hoshino, R., Matsunaga, S., Tsukaya, H.,  
746 and Tsukaya (2016). The coordination of ploidy and cell size differs between cell  
747 layers in leaves. *Development* *143*, 1120–1125.
- 748 Kawade, K., and Tsukaya, H. (2017). Probing the stochastic property of  
749 endoreduplication in cell size determination of *Arabidopsis thaliana* leaf epidermal  
750 tissue. *PLoS One* *12*, e0185050.
- 751 Kawade, K., Horiguchi, G., and Tsukaya, H. (2010). Non-cell-autonomously  
752 coordinated organ size regulation in leaf development. *Development* *137*, 4221–  
753 4227.
- 754 Kuchen, E.E., Fox, S., de Reuille, P.B., Kennaway, R., Bensmihen, S., Avondo, J.,  
755 Calder, G.M., Southam, P., Robinson, S., Bangham, A., et al. (2012). Generation  
756 of leaf shape through early patterns of growth and tissue polarity. *Science* *335*,  
757 1092–1096.
- 758 Lee, H.-C., Chen, Y.-J., Markhart, A.H., and Lin, T.-Y. (2007). Temperature effects  
759 on systemic endoreduplication in orchid during floral development. *Plant Sci.* *172*,  
760 588–595.
- 761 Legland, D., Devaux, M.-F., Bouchet, B., Guillon, F., and Lahaye, M. (2012).  
762 Cartography of cell morphology in tomato pericarp at the fruit scale. *J. Microsc.*  
763 *247*, 78–93.
- 764 Lescourret, F., and Génard, M. (2003). A multi-level theory of competition for  
765 resources applied to fruit production. *Écoscience* *10*, 334–341.
- 766 Liu, H.-F.F.H.-F., Génard, M., Guichard, S., and Bertin, N. (2007). Model-assisted  
767 analysis of tomato fruit growth in relation to carbon and water fluxes. *J. Exp. Bot.*  
768 *58*, 3567–3580.
- 769 Lockhart JA. 1965. An analysis of irreversible plant cell elongation. *Journal of*  
770 *Theoretical Biology* *8*, 264–275.
- 771 Löffke, C., Dünser, K., Scheuring, D., Kleine-Vehn, J., Barbez, E., Kubeš, M.,  
772 Rolčík, J., Béziat, C., Pěňčík, A., Wang, B., et al. (2015). Auxin regulates SNARE-  
773 dependent vacuolar morphology restricting cell size. *Elife* *4*, 119–122.
- 774 Lucas, M., Kenobi, K., von Wangenheim, D., Voß, U., Swarup, K., De Smet, I.,  
775 Van Damme, D., Lawrence, T., Péret, B., Moscardi, E., et al. (2013). Lateral root  
776 morphogenesis is dependent on the mechanical properties of the overlaying

- 777 tissues. *Proc. Natl. Acad. Sci. U. S. A.* *110*, 5229–5234.
- 778 McAtee, P.A., Hallett, I.C., Johnston, J.W., and Schaffer, R.J. (2009). A rapid  
779 method of fruit cell isolation for cell size and shape measurements. *Plant*  
780 *Methods* *5*, 5.
- 781 Mebatsion, H.K., Verboven, P., Melese Endalew, A., Billen, J., Ho, Q.T., and  
782 Nicolaï, B.M. (2009). A novel method for 3-D microstructure modeling of pome  
783 fruit tissue using synchrotron radiation tomography images. *J. Food Eng.* *93*,  
784 141–148.
- 785 Melaragno, J., Mehrotra, B., and Coleman, A. (1993). Relationship between  
786 endopolyploidy and cell size in epidermal tissue of *Arabidopsis*. *Plant Cell Online*  
787 *5*, 1661–1668.
- 788 Musseau, C., Just, D., Jorly, J., G?vaudant, F., Moing, A., Chevalier, C., Lemaire-  
789 Chamley, M., Rothan, C., and Fernandez, L. (2017). Identification of Two New  
790 Mechanisms That Regulate Fruit Growth by Cell Expansion in Tomato. *Front.*  
791 *Plant Sci.* *8*, 1–15.
- 792 Norman, J.M. Van, Breakfield, N.W., Benfey, P.N., Carolina, N., Van Norman,  
793 J.M., Breakfield, N.W., and Benfey, P.N. (2011). Intercellular communication  
794 during plant development. *Plant Cell* *23*, 855–864.
- 795 Okello, R.C.O., Heuvelink, E., de Visser, P., Struik, P.C., and Marcelis, L.F.M.  
796 (2015). What drives fruit growth? *Funct. Plant Biol.* *42*, 817.
- 797 Osella, M., Nugent, E., and Cosentino Lagomarsino, M. (2014). Concerted control  
798 of *Escherichia coli* cell division. *Proc. Natl. Acad. Sci. U. S. A.* *111*, 4–8.
- 799 Pirrello, J., Deluche, C., Frangne, N., Gévaudant, F., Maza, E., Djari, A., Bourge,  
800 M., Renaudin, J.-P., Brown, S., Bowler, C., et al. (2018). Transcriptome profiling of  
801 sorted endoreduplicated nuclei from tomato fruits: how the global shift in  
802 expression ascribed to DNA ploidy influences RNA-Seq data normalization and  
803 interpretation. *Plant J.* *93*, 387–398.
- 804 Proseus, T.E., and Boyer, J.S. (2006). Identifying cytoplasmic input to the cell wall  
805 of growing *Chara corallina*. *J. Exp. Bot.* *57*, 3231–3242.
- 806 Proseus, T.E., Ortega, J.K.E., and Boyer, J.S. (1999). Separating Growth from  
807 Elastic Deformation during Cell Enlargement. *Plant Physiol.* *119*, 775–784.
- 808 Prudent, M., Dai, Z.W., Génard, M., Bertin, N., Causse, M., and Vivin, P. (2013).  
809 Resource competition modulates the seed number-fruit size relationship in a  
810 genotype-dependent manner: A modeling approach in grape and tomato. *Ecol.*

- 811 Modell.
- 812 Quilot, B., and Génard, M. (2008). Is competition between mesocarp cells of  
813 peach fruits affected by the percentage of wild species ( *Prunus davidiana* )  
814 genome? *J. Plant Res.* *121*, 55–63.
- 815 Renaudin, J.-P., Deluche, C., Cheniclet, C., Chevalier, C., and Frangne, N.  
816 (2017). Cell layer-specific patterns of cell division and cell expansion during fruit  
817 set and fruit growth in tomato pericarp. *J. Exp. Bot.* *68*, 1613–1623.
- 818 Rewers, M., Sadowski, J., and Sliwinska, E. (2009). Endoreduplication in  
819 cucumber ( *Cucumis sativus* ) seeds during development, after processing and  
820 storage, and during germination. *Ann. Appl. Biol.* *155*, 431–438.
- 821 Robinson DO, Coate JE, Singh A, Hong L, Bush M, Doyle JJ, Roeder AHK, Jeff J.  
822 2018. Ploidy and Size at Multiple Scales in the Arabidopsis Sepal. *Plant Cell* *30*,  
823 2308–2329.
- 824 Robinson, S., Barbier de Reuille, P., Chan, J., Bergmann, D., Prusinkiewicz, P.,  
825 and Coen, E. (2011). Generation of spatial patterns through cell polarity  
826 switching. *Science* (80-. ). *333*, 1436–1440.
- 827 Roeder, A.H.K., Chickarmane, V., Cunha, A., Obara, B., Manjunath, B.S., and  
828 Meyerowitz, E.M. (2010). Variability in the control of cell division underlies sepal  
829 epidermal patterning in *Arabidopsis thaliana*. *PLoS Biol.* *8*, e1000367.
- 830 Sablowski, R., and Carnier Dornelas, M. (2014). Interplay between cell growth  
831 and cell cycle in plants. *J. Exp. Bot.* *65*, 2703–2714.
- 832 Sassi, M., and Traas, J. (2015). When biochemistry meets mechanics: a systems  
833 view of growth control in plants. *Curr. Opin. Plant Biol.* *28*, 137–143.
- 834 Schoenfelder KP, Fox DT. 2015. The expanding implications of polyploidy. *The*  
835 *Journal of cell biology* *209*, 485–91.
- 836 Serrano-Mislata, A., Schiessl, K., and Sablowski, R. (2015). Active Control of Cell  
837 Size Generates Spatial Detail during Plant Organogenesis. *Curr. Biol.* *25*, 2991–  
838 2996.
- 839 Setter TL, Flannigan B.A. 2001. Water deficit inhibits cell division and expression  
840 of transcripts involved in cell proliferation and endoreduplication in maize  
841 endosperm. *Journal of experimental botany* *52*, 1401–8.
- 842 Stukalin, E.B., Aifuwa, I., Kim, J.S., Wirtz, D., and Sun, S.X. (2013). Age-  
843 dependent stochastic models for understanding population fluctuations in

- 844 continuously cultured cells. *J. R. Soc. Interface* 10, 20130325.
- 845 Sugimoto-Shirasu, K., and Roberts, K. (2003). “Big it up”: endoreduplication and  
846 cell-size control in plants. *Curr. Opin. Plant Biol.* 6, 544–553.
- 847 Tauriello G, Meyer HM, Smith RS, Koumoutsakos P, Roeder AHK. 2015.  
848 Variability and constancy in cellular growth of *Arabidopsis* sepals. *Plant*  
849 *Physiology* 169, pp.00839.2015.  
850
- 851 Tsukaya, H. (2003). Organ shape and size: a lesson from studies of leaf  
852 morphogenesis. *Curr. Opin. Plant Biol.* 6, 57–62.
- 853 von Wangenheim, D., Fangerau, J., Schmitz, A., Smith, R.S., Leitte, H., Stelzer,  
854 E.H.K., and Maizel, A. (2016). Rules and Self-Organizing Properties of Post-  
855 embryonic Plant Organ Cell Division Patterns. *Curr. Biol.* 26, 439–449.
- 856 Wuyts, N., Palauqui, J.-C., Conejero, G., Verdeil, J.-L., Granier, C., and  
857 Massonnet, C. (2010). High-contrast three-dimensional imaging of the  
858 *Arabidopsis* leaf enables the analysis of cell dimensions in the epidermis and  
859 mesophyll. *Plant Methods* 6, 17.
- 860 Zambryski, P.C. (2004). Cell-to-cell transport of proteins and fluorescent tracers  
861 via plasmodesmata during plant development. *J. Cell Biol.* 164, 165–168.

862 **Figures**

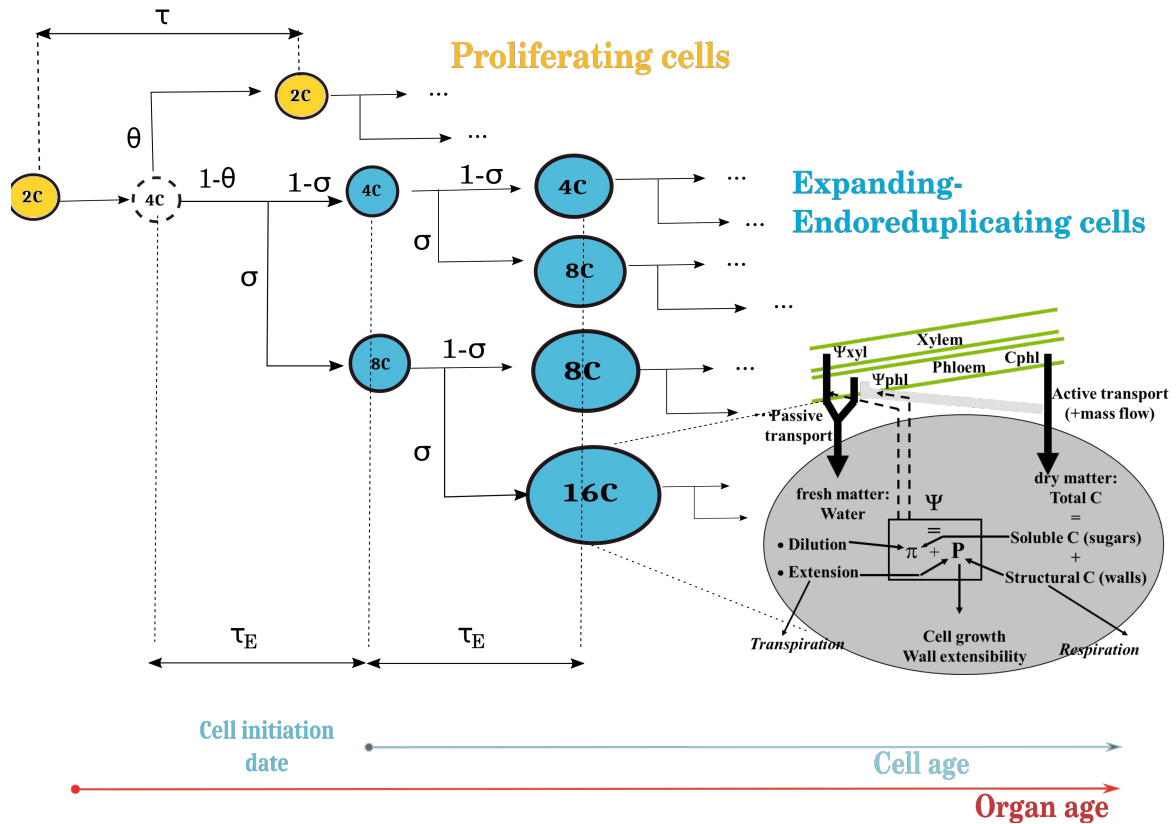

863 **Figure 1:** Scheme of the integrated model. The fruit is described as a collection of cell  
 864 populations, each one having a specific age, ploidy and volume. Cells can be either proliferating  
 865 or expanding-endoreduplicating. The number of cells in each class is predicted by the division-  
 866 endoreduplication module, assuming a progressive decline of cells' proliferating activity.  
 867 Expanding cells grow according to the expansion module which provides a biophysical description  
 868 of the main processes involved in carbon and water accumulation. It is assumed that the onset of  
 869 endoreduplication coincides with the beginning of the expansion phase. Two timescales are  
 870 recognizable in the model: the organ age i.e. the time since the beginning of the simulation, and  
 871 the cell age i.e. the time since the cell left the mitotic cycle and entered the expansion-  
 872 endoreduplication phase. Depending on the model version, cell expansion may be modulated by  
 873 organ age (organ-wide control) and/or by cell ploidy.



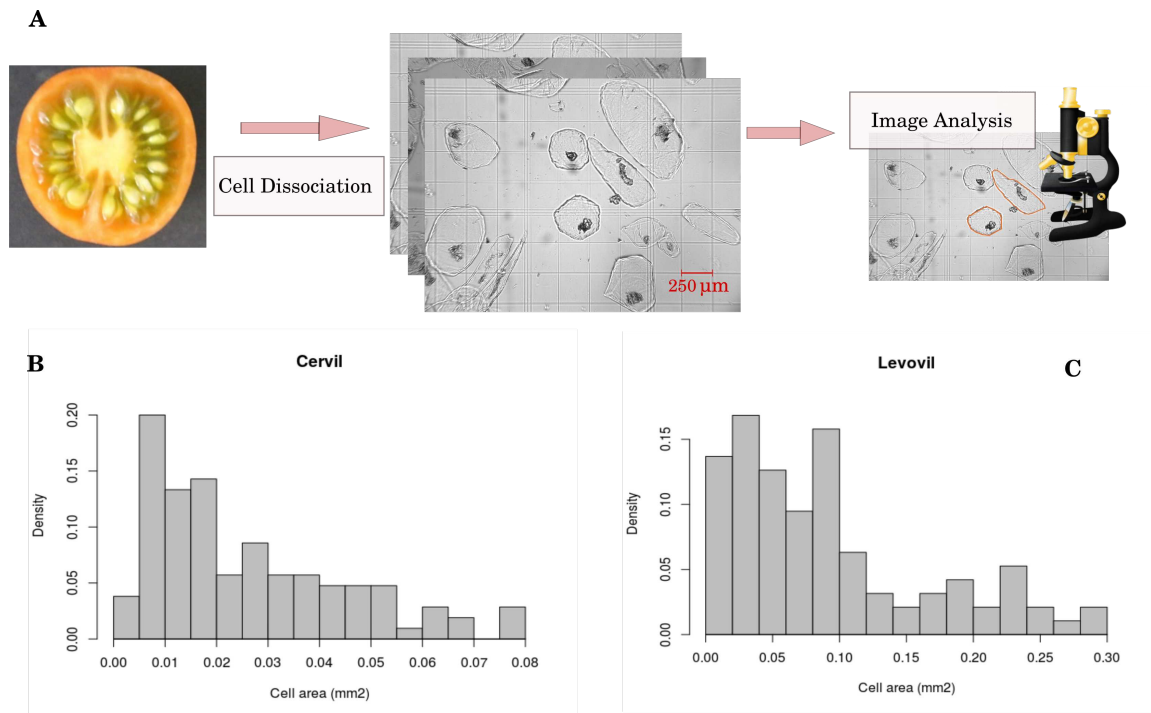

874 **Figure 2:** *Top, panel A:* schematic representation of our experimental procedure for cell size  
875 estimation. About half of the fruit pericarp underwent tissue dissociation. Cells were divided in  
876 different aliquots and spotted onto clean glass slide, before microscope imaging. Images were  
877 collected with a digital camera and analysed using ImageJ software. *Bottom:* Measured cell size  
878 distribution at fruit maturity *B:* Cervil genotype. *C:* Levovil genotype.

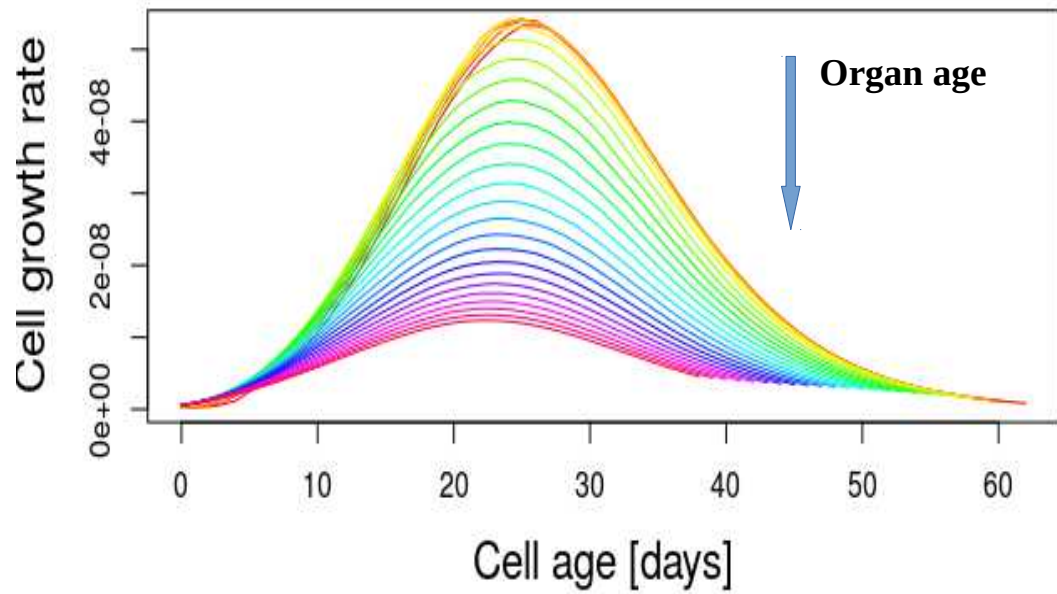

879 **Figure 3:** Effect of the organ-wide control on the cell growth rate. Cells that enter the expansion  
880 phase late during organ development (large organ age) have a lower growth rate due to the  
881 progressive reduction of the symplastic carbon transport. Simulations have been obtained with  
882 model M1, Levovil genotype.

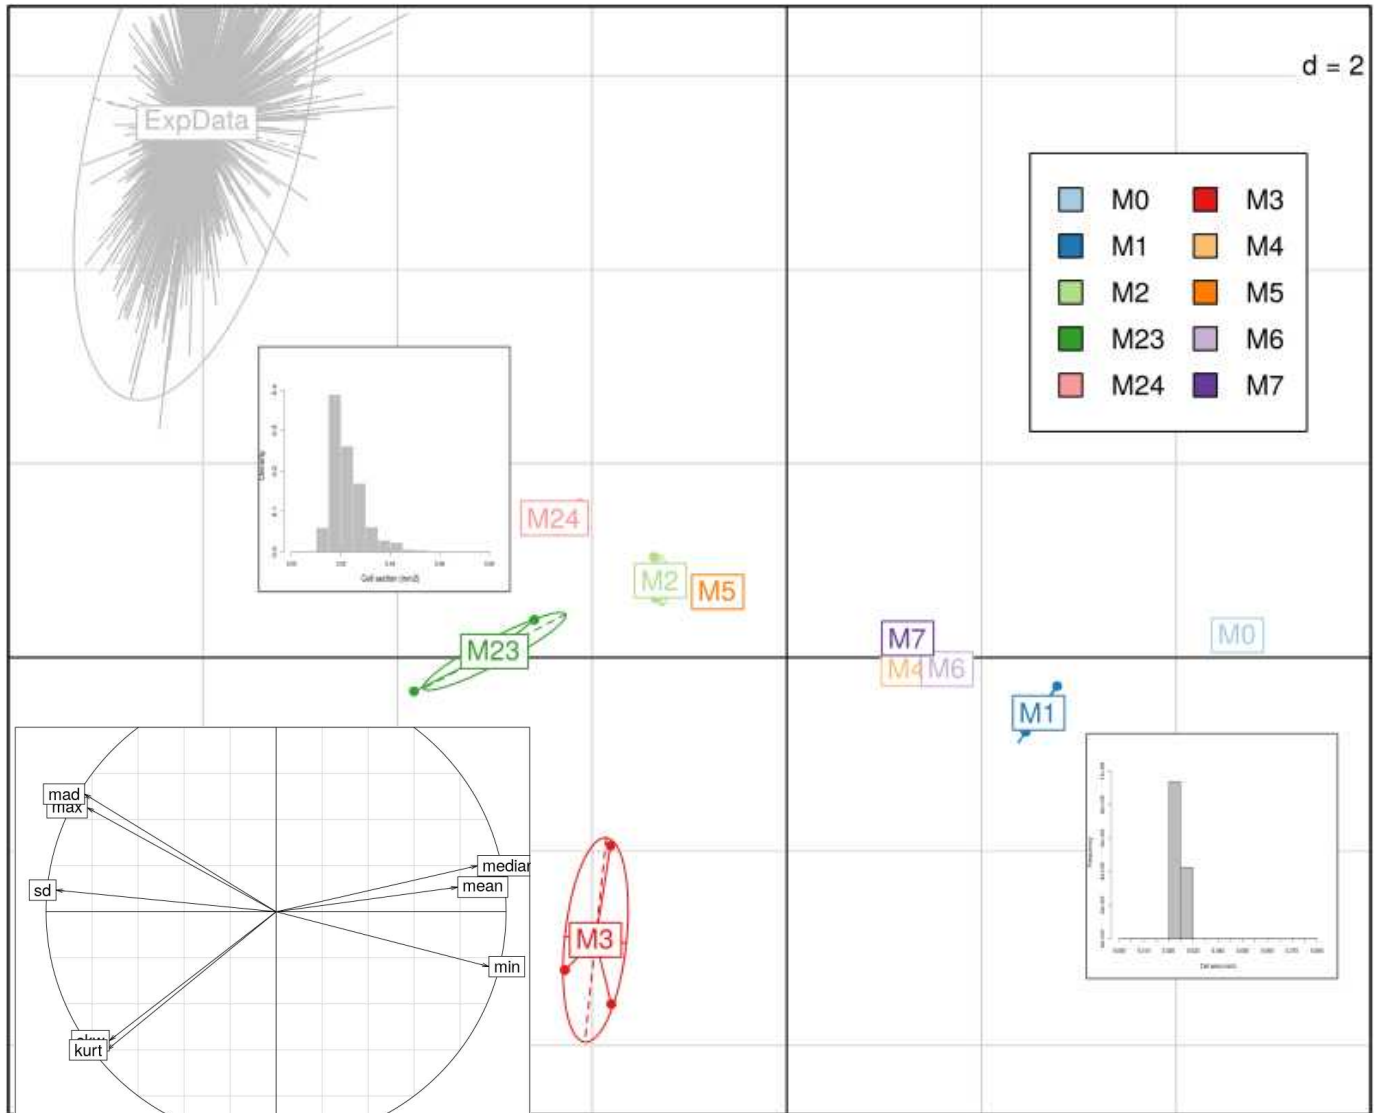

883 **Figure 4:** Principal component analysis (PCA) cell size distributions obtained for the different  
 884 estimations of models M0-M24 on Cervil genotype. *Main plot:* Projection of individual distributions  
 885 on the PC1-PC2 plane (respectively 72% and 16% of variance explained);  $d$  is the grid unit.  
 886 Bootstrap results on measured cell size data are projected as a supplementary observation.  
 887 Model variants are tagged with different colors. Typical cell size distribution shapes are sketched  
 888 for the main subgroups. *Inset:* Correlation of the variables with the first two principal components.

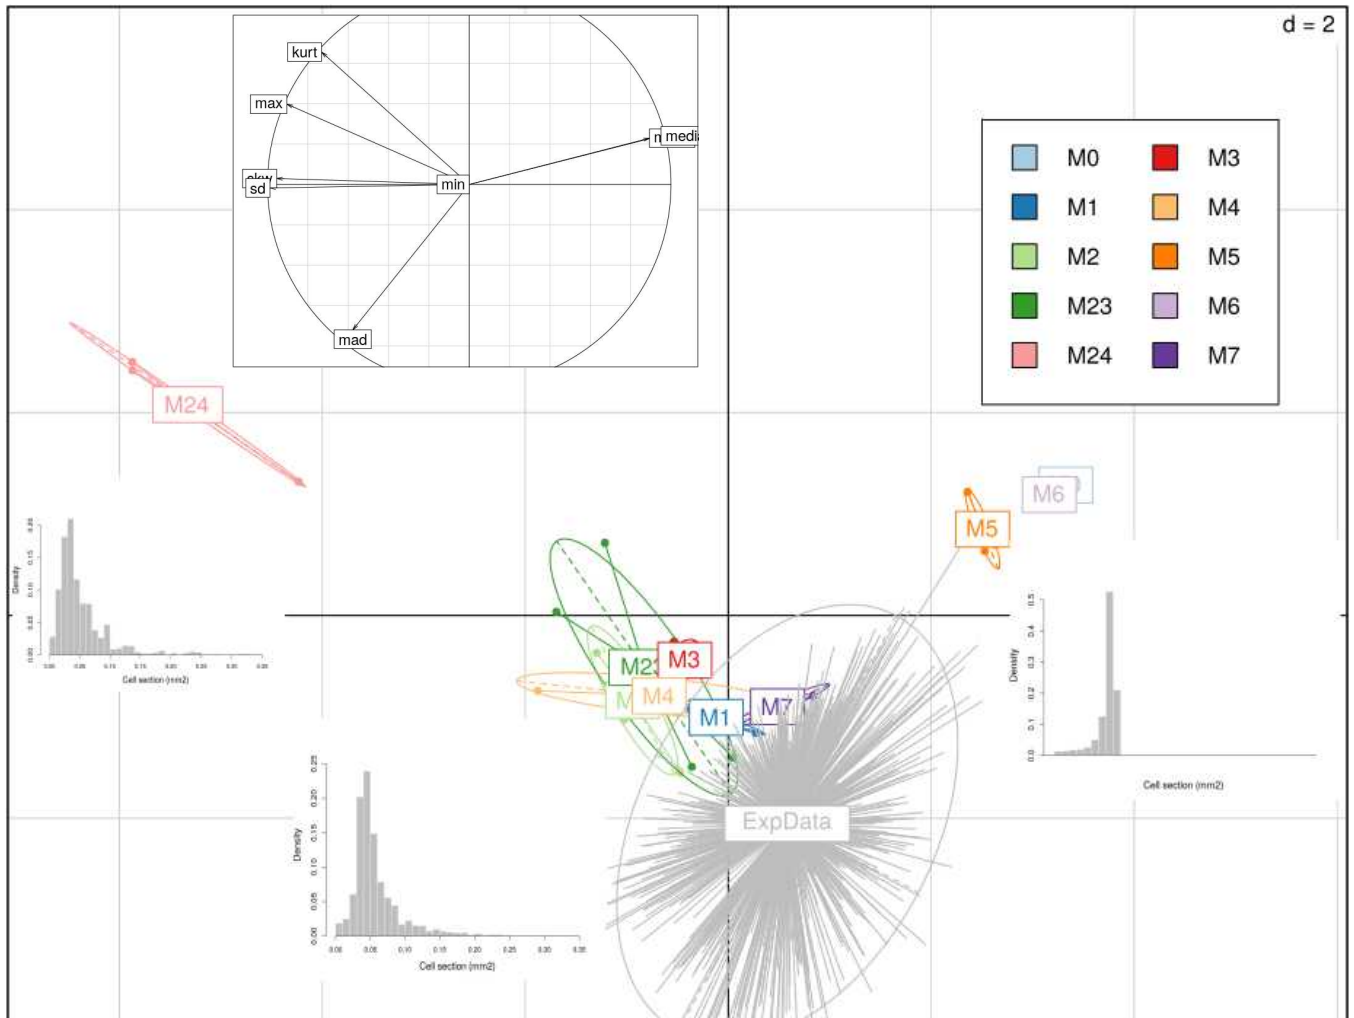

889 **Figure 5:** Principal component analysis (PCA) cell size distributions obtained for the different  
890 estimations of models M0-M24 on Levovil genotype. *Main plot:* Projection of individual  
891 distributions on the PC1-PC2 plane (respectively 75% and 17% of variance explained);  $d$  is the  
892 grid unit. Bootstrap results on measured cell size data are projected as a supplementary  
893 observation. Model variants are tagged with different colors. Typical cell size distribution shapes  
894 are sketched for the main subgroups. *Inset:* Correlation of the variables with the first two principal  
895 components.

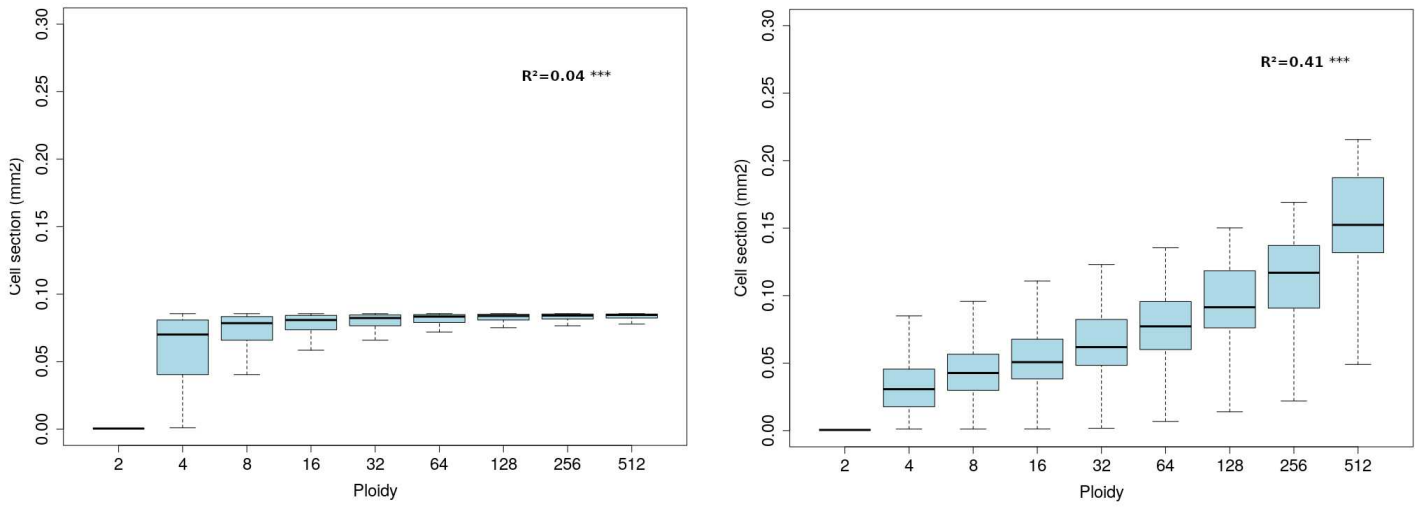

897 **Figure 6** : Simulated relation between ploidy and cell size at fruit maturity for the Levovil  
898 genotype. *Left*: model M0. *Right*: model M23. The adjusted  $R^2$  corresponding to a linear  
899 regression model is reported.

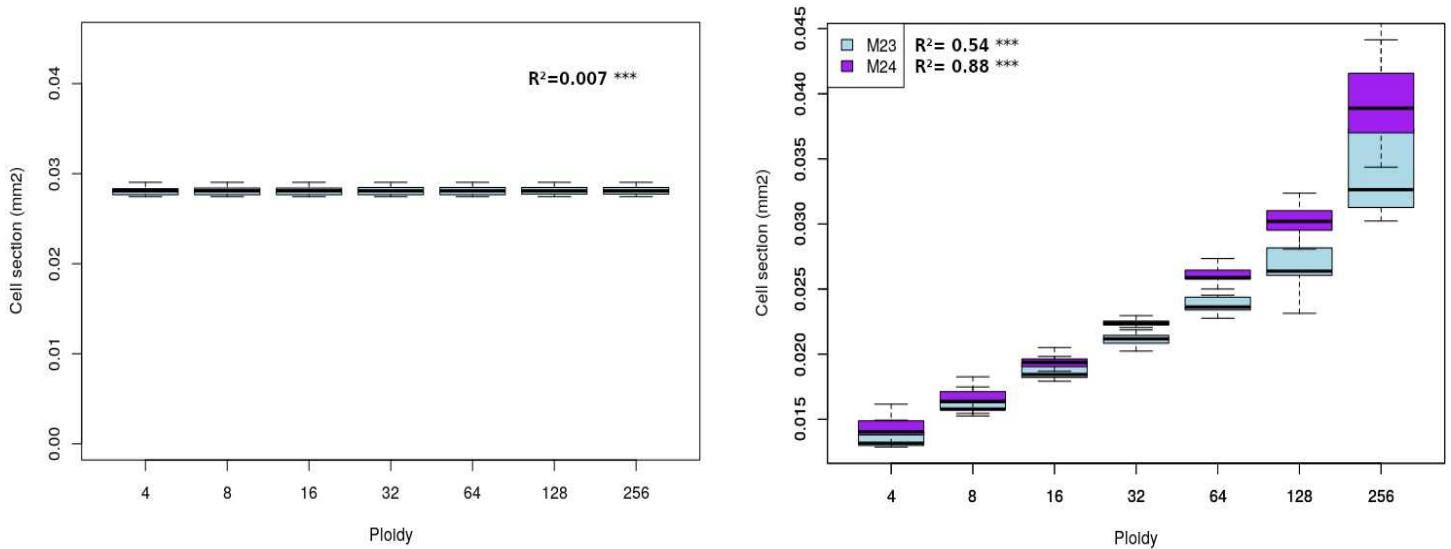

900 **Figure 7**: Simulated relation between ploidy and cell size at fruit maturity for the Cervil genotype.  
901 *Left*: model M0. *Right*: models M23 and M24. The adjusted  $R^2$  corresponding to a linear regression  
902 model is reported.

903 **Tables**

| Model Variant | ORGAN CONTROL        | ENDO EFFECT     |                   |                 |
|---------------|----------------------|-----------------|-------------------|-----------------|
|               | symplastic transport | Active C uptake | Carbon allocation | Wall plasticity |
| M0            |                      |                 |                   |                 |
| M1            | ✓                    |                 |                   |                 |
| M2            | ✓                    | ✓               |                   |                 |
| M3            | ✓                    |                 | ✓                 |                 |
| M4            | ✓                    |                 |                   | ✓               |
| M5            |                      | ✓               |                   |                 |
| M6            |                      |                 | ✓                 |                 |
| M7            |                      |                 |                   | ✓               |
| M23           | ✓                    | ✓               | ✓                 |                 |
| M24           | ✓                    | ✓               |                   | ✓               |

904 **Table 1:** Experimental design showing the characteristics of the 10 model versions tested  
905 in the paper.

| MODEL           | FRUIT MASS  |          | CELL DISTRIBUTION |                |                    |                    |               |                        |                    |                    |
|-----------------|-------------|----------|-------------------|----------------|--------------------|--------------------|---------------|------------------------|--------------------|--------------------|
|                 | FIT QUALITY |          | SHAPE             |                | POSITIONING        |                    |               |                        | DISPERSION         |                    |
|                 | NRMSE FM    | NRMSE DM | Skewness          | Kurtosis       | Mean               | Median             | Min           | Max                    | Sd                 | MAD                |
| <b>Exp Data</b> |             |          | <b>0.97</b>       | <b>3.13</b>    | <b>0.026</b>       | <b>0.019</b>       | <b>0.0039</b> | <b>0.08</b>            | <b>0.019</b>       | <b>0.016</b>       |
| <b>CI 95 %</b>  |             |          | <b>0.63-1.34</b>  | <b>2.3-4.4</b> | <b>0.023-0.030</b> | <b>0.016-0.025</b> | -             | <b>&gt; 0.069-0.08</b> | <b>0.017-0.022</b> | <b>0.013-0.023</b> |
| M0              | 29.46       | 25.06    | 0.05              | 1.9            | 0.025              | 0.025              | 0.024         | 0.026                  | 0.0003             | 0.0003             |
| M1              | 28.53       | 24.40    | 1.21              | 4.2            | 0.025              | 0.024              | 0.023         | 0.027                  | 0.0008             | 0.0005             |
| M2              | 29.44       | 25.65    | 1.66              | 11.4           | 0.023              | 0.023              | 0.016         | 0.13                   | 0.005              | 0.004              |
| M3              | 22.45       | 22.36    | 3.5               | 18             | 0.022              | 0.020              | 0.017         | 0.059                  | 0.006              | 0.002              |
| M4              | 24.86       | 24.29    | 0.59              | 3.8            | 0.022              | 0.022              | 0.019         | 0.031                  | 0.0015             | 0.0014             |
| M5              | 31.13       | 26.36    | 1.48              | 9.2            | 0.024              | 0.022              | 0.017         | 0.11                   | 0.004              | 0.004              |
| M6              | 25.57       | 24.66    | -0.46             | 5.4            | 0.023              | 0.023              | 0.017         | 0.027                  | 0.0006             | 0.0006             |
| M7              | 27.0        | 25.07    | 0.42              | 3.16           | 0.023              | 0.023              | 0.019         | 0.038                  | 0.0019             | 0.0019             |
| M23             | 22.93       | 22.50    | 2.48              | 13.8           | 0.022              | 0.021              | 0.012         | 0.12                   | 0.007              | 0.004              |
| M24             | 25.72       | 24.90    | 1.44              | 7.3            | 0.022              | 0.022              | 0.012         | 0.14                   | 0.006              | 0.005              |

906 **Table 2:** Statistical descriptors for the measured and predicted cell area distribution for Cervil  
907 genotype. The NRMSE scores for predicted pericarp dry and fresh masses corresponding to  
908 the selected solution are reported under the columns "Fit Quality". For an easier interpretation,  
909 green and yellow boxes indicate, respectively, a satisfactory (i.e. NRMSE < 25 and a moment  
910 values within the confidence interval of experimental measurement) and a partial agreement to  
911 data (NRMSE between 25 and 30, moments near the limit of the confidence interval).

| MODEL                      | FRUIT MASS  |          | CELL DISTRIBUTION |                 |                   |                    |              |                  |                    |                    |
|----------------------------|-------------|----------|-------------------|-----------------|-------------------|--------------------|--------------|------------------|--------------------|--------------------|
|                            | FIT QUALITY |          | SHAPE             |                 | POSITIONING       |                    |              |                  | DISPERSION         |                    |
|                            | NRMSE FM    | NRMSE DM | Skewness          | Kurtosis        | Mean              | Median             | Min          | Max              | Sd                 | MAD                |
| <b>Exp Data (red only)</b> |             |          | <b>0.97</b>       | <b>3.15</b>     | <b>0.094</b>      | <b>0.082</b>       | <b>0.008</b> | <b>0.29</b>      | <b>0.072</b>       | <b>0.058</b>       |
| <b>CI 95 % *</b>           |             |          | <b>0.60-1.42</b>  | <b>2.25-4.8</b> | <b>0.079-0.11</b> | <b>0.059-0.092</b> |              | <b>0.23-0.29</b> | <b>0.061-0.085</b> | <b>0.041-0.092</b> |
| M0                         | 30.04       | 34.38    | -2.47             | 9.14            | 0.075             | 0.082              | 0.00049      | 0.085            | 0.016              | 0.005              |
| M1                         | 25.07       | 28.59    | 0.76              | 3.37            | 0.065             | 0.058              | 0.00049      | 0.15             | 0.032              | 0.022              |
| M2                         | 24.02       | 30.21    | 1.02              | 4.19            | 0.062             | 0.055              | 0.00049      | 0.31             | 0.040              | 0.021              |
| M3                         | 23.65       | 24.75    | 1.8               | 7.05            | 0.059             | 0.050              | 0.00049      | 0.21             | 0.033              | 0.018              |
| M4                         | 25.35       | 29.67    | 0.78              | 3.9             | 0.066             | 0.062              | 0.00049      | 0.19             | 0.032              | 0.027              |
| M5                         | 31.06       | 35.58    | 2.4               | 8.58            | 0.072             | 0.078              | 0.00049      | 0.090            | 0.016              | 0.006              |
| M6                         | 30.39       | 33.64    | -2.48             | 9.14            | 0.071             | 0.078              | 0.00049      | 0.081            | 0.016              | 0.005              |
| M7                         | 31.40       | 35.80    | 0.61              | 3.38            | 0.068             | 0.062              | 0.00049      | 0.17             | 0.032              | 0.026              |
| M23                        | 24.51       | 27.48    | 0.99              | 4.47            | 0.062             | 0.056              | 0.00049      | 0.22             | 0.033              | 0.030              |
| M24                        | 24.83       | 30.93    | 6.65              | 77.54           | 0.056             | 0.038              | 0.00049      | 1.1              | 0.064              | 0.022              |

912 **Table 3:** Statistical descriptors for the measured and predicted cell area distribution for Levovil  
913 genotype. The NRMSE scores for predicted pericap dry and fresh masses corresponding to the  
914 selected solution are reported under the columns “Fit Quality”. For an easier interpretation, green  
915 and yellow boxes indicate, respectively, a satisfactory (i.e. NRMSE < 25 and a moment values  
916 within the confidence interval of experimental measurement) and a partial agreement to data  
917 (NRMSE between 25 and 30, moments near the limit of the confidence interval).
